# Supplementary material for: Significant Locus and Metabolic Genetic Correlations Revealed in Genome-Wide Association Study of Anorexia Nervosa
Source: Atypon-hosted journal article supplement (doi:10.1176/appi.ajp.2017.16121402), 2017-05-12
Supplement: appi.ajp.2017.16121402.ds001.pdf [file appi.ajp.2017.16121402.ds001.pdf]

 


Psychiatry Online
